# Supplementary material for: Invasive Colon Cancer Cells Induce Transdifferentiation of Endothelium to Cancer-Associated Fibroblasts through Microtubules Enriched in Tubulin-β3
Source: PubMed Central journal article supplement (PMC6337286; doi:10.3390/ijms20010053), 2018-12-23
Supplement: ijms-20-00053-s001.pdf [file ijms-20-00053-s001.pdf]

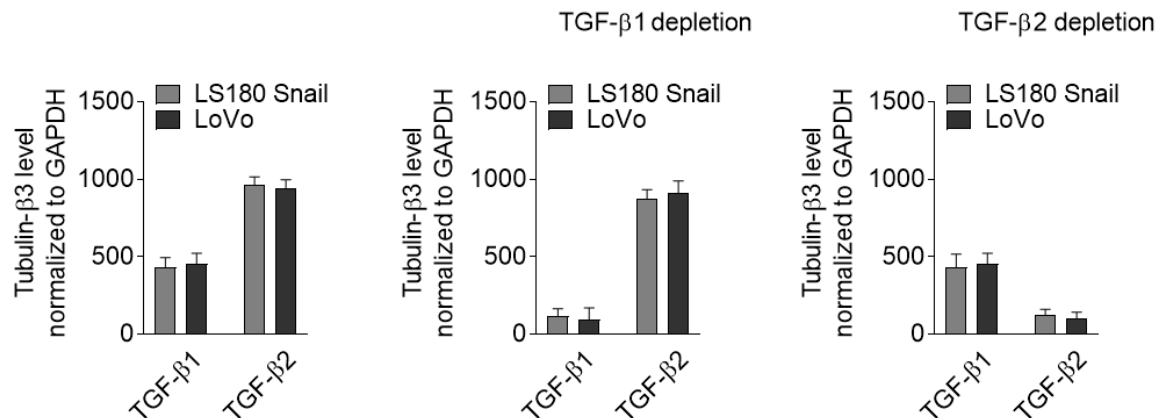

**Figure S1.** Conditioned medium from invasive colon cancer cells induces the early stages of EndMT in HMEC-1 cells. The level of TGF- $\beta$ 1 and TGF- $\beta$ 2 secreted into the medium was quantified by ELISA. The results are provided as mean  $\pm$  SD (N=3). Methods of TGF- $\beta$ s quantification in CM from colon cancer cell lines: The level of each TGF- $\beta$  was measured by Quantikine ELISA Kits (R&D Systems, Minneapolis, MN) according to the manufacturer's procedure. The optical density of analyzed samples was measured at 450 nm using microplate reader (Bio-Rad, Hercules, CA) and corrected against-absorption at 570 nm.

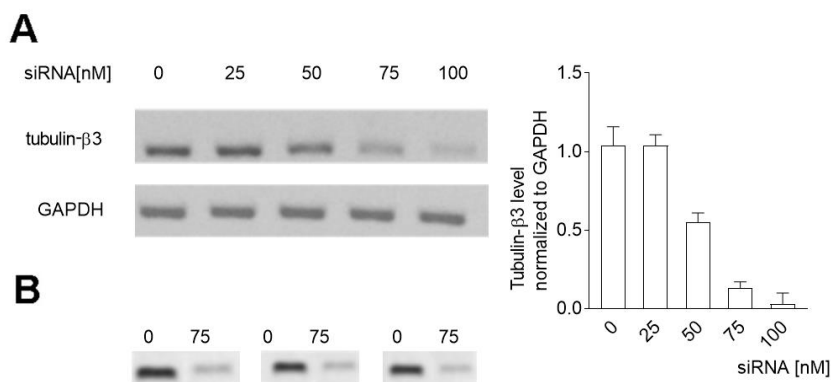

**Figure S2.** Effect of tubulin- $\beta$ 3 silencing in HMEC-1 stimulated cells. Analysis of siRNA anti-tubulin- $\beta$ 3 concentration silencing tested tubulin isoform by Western blot method. Level of tubulin- $\beta$ 3 in each sample was compared to GAPDH used as a loading control (A). Analysis of 75 nM siRNA treatment of the experimental probes in the three independent experiments (B). Level of tubulin- $\beta$ 3 in each sample was compared to GAPDH used as a loading control.

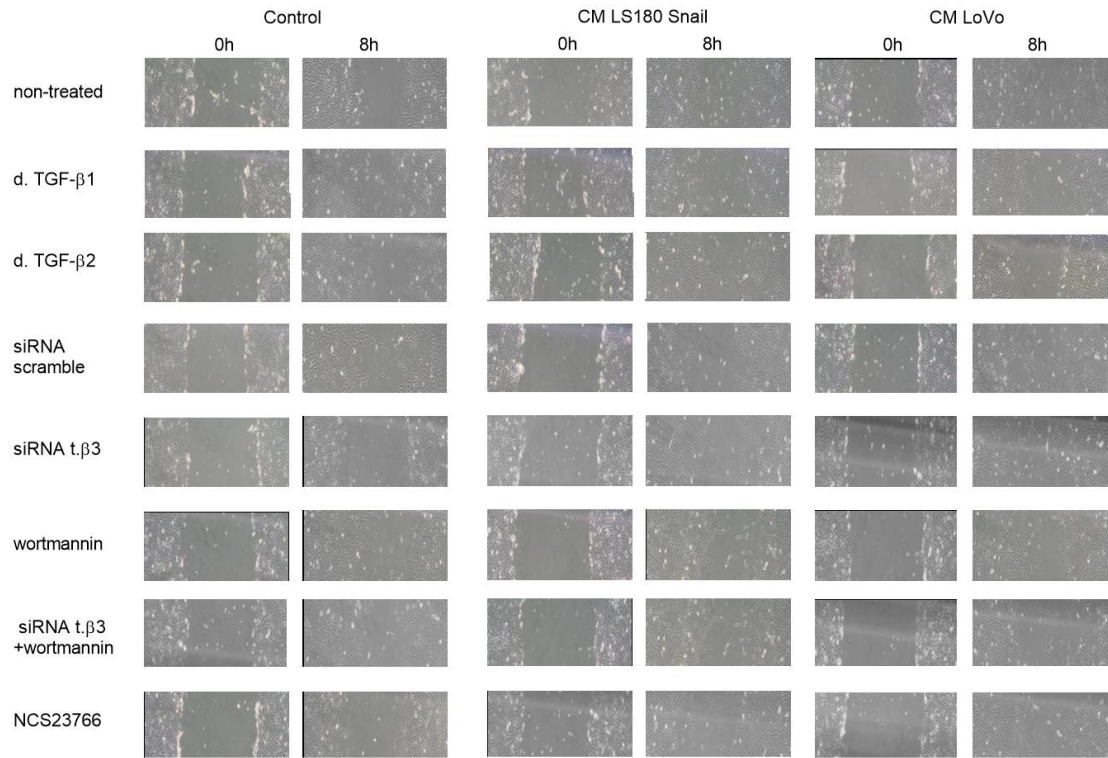

**Figure S3.** Phosphorylation of microtubular tubulin- $\beta$ 3 regulates CAFs behavior. HMEC-1 cells were cultured in medium supplemented with conditioned medium (CM) isolated from invasive (LS180-Snail, LoVo) colon cancer cells where TGF- $\beta$ 1 or TGF- $\beta$ 2 were depleted (d. TGF- $\beta$ 1 or d. TGF- $\beta$ 2) for 216 h or where tubulin- $\beta$ 3 was silenced (siRNA t.  $\beta$ 3), phosphorylation of tubulin- $\beta$ 3 was inhibited by wortmannin. Additionally, in tubulin- $\beta$ 3-silenced cells (siRNA t.  $\beta$ 3) the phosphorylation of tubulin- $\beta$ 3 was inhibited by wortmannin or Rac1 activity was inhibited by NCS23766. Then the wound healing properties were analyzed. Representative image were shown in the Figure above.

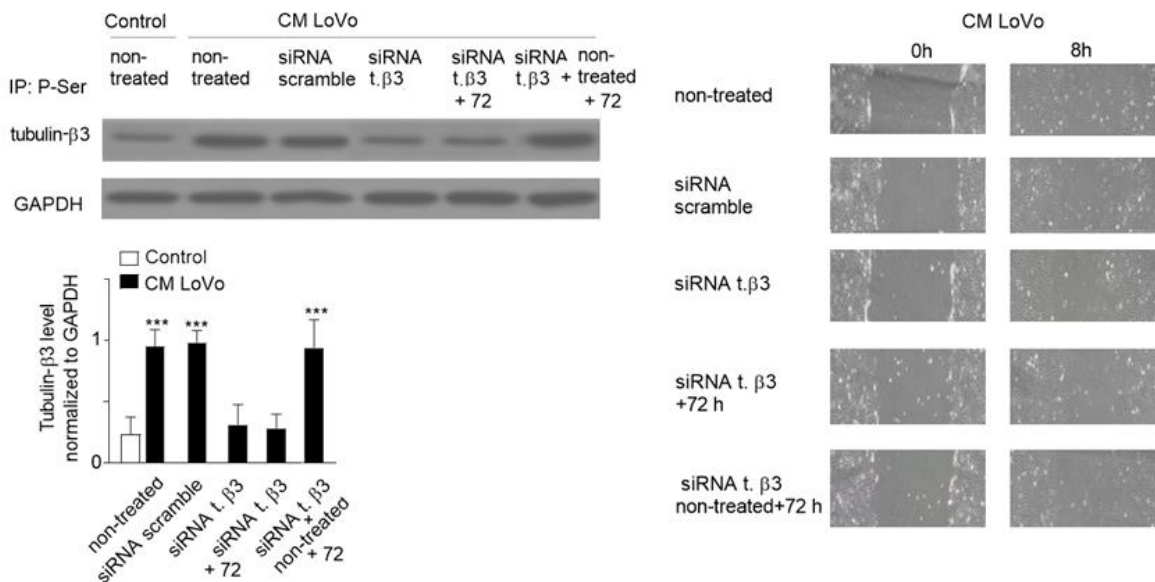

**Figure S4.** Expression of tubulin- $\beta$ 3 during recovery experiment. Level of tubulin- $\beta$ 3 expression in each experimental condition was analyzed by Western blot assay. GAPDH was used as a loading control. The results of three independent experiments are provided as mean  $\pm$  SD (n=3); \*\*\* $p$  < 0.005. Then analysis of wound healing abilities was performed. The representative images of that assay were presented in the Figure.
